# Supplementary material for: Understanding the crystallization behavior of polyamide 6/polyamide 66 alloys from the perspective of hydrogen bonds: projection moving-window 2D correlation FTIR spectroscopy and the enthalpy
Source: Royal Society of Chemistry journal article supplement (doi:10.1039/c6ra09611e), 2016-01-01
Supplement: c6ra09611e1.pdf [file c6ra09611e1.pdf]

**Supporting Information**  
**for**  
**Understanding the Crystallization Behavior of**  
**Polyamide6/Polyamide66 Alloys from the Perspective of**  
**Hydrogen Bonds: Projection Moving-Window 2D Correlation**  
**FTIR Spectroscopy and the Enthalpy**

*Yanan Ma, Tao Zhou,\* Gehong Su, Yan Li, and Aiming Zhang*

State Key Laboratory of Polymer Materials Engineering of China, Polymer Research  
Institute, Sichuan University, Chengdu 610065, China.

\*Corresponding author. Tel.: +86-28-85402601; Fax: +86-28-85402465; E-mail address:  
zhoutaopoly@scu.edu.cn (T. Zhou)

# 1. Theory of Projection-MW2D based on auto-correlation

## 1.1. Spectral data matrix

Entire infrared spectrum is actually a large matrix  $A$ , a region of spectroscopy or a series of spectral correlation spectroscopy is called sub-matrix which is also considered as a window.

$A$  is supposed to be an  $M \times N$  matrix of entire infrared spectral data with  $M$  rows and  $N$  columns. The  $\nu$  and  $I$  represent the spectral variables (e.g., wavenumber) and external perturbation variables (e.g., temperature), respectively. Each row of  $A$  corresponds to the discrete data points of a spectrum.

$$A = \begin{pmatrix} y(\nu, I_1) \\ \vdots \\ y(\nu, I_j) \\ \vdots \\ y(\nu, I_M) \end{pmatrix} \quad (1)$$

The sub-matrix  $A_j$  is extracted from the main matrix  $A$ . At this point, the serial number of the perturbation variable  $I$  ranges from  $j-m$  to  $j+m$ . Obviously, the sub-matrix  $A_j$  has  $2m+1$  rows, whose column number is the same as the main matrix  $A$ . The  $2m+1$  is called the window size.

$$A_j = \begin{pmatrix} y(\nu, I_{j-m}) \\ \vdots \\ y(\nu, I_j) \\ \vdots \\ y(\nu, I_{j+m}) \end{pmatrix} \quad (2)$$

In general, the reference spectrum and the dynamic spectrum of the  $j$ th sub-matrix are calculated by the following formulas.

$$\bar{y}(\nu) = \frac{1}{2m+1} \sum_{J=j-m}^{j+m} y(\nu, I_J) \quad (3)$$

$$\tilde{y}(\nu, I_J) = y(\nu, I_J) - \bar{y}(\nu) \quad (4)$$

where  $J$  is a row number within a sub-matrix.

The mean-centered  $j$ th sub-matrix can be described as follows:

$$\tilde{A}_j = \frac{1}{\sqrt{2m}} \begin{pmatrix} \tilde{y}(v, I_{j-m}) \\ \vdots \\ \tilde{y}(v, I_j) \\ \vdots \\ \tilde{y}(v, I_{j+m}) \end{pmatrix} \quad (5)$$

## 1.2. Projection matrix

Then, we select a matrix  $Y$  from  $\tilde{A}_j$ , and its rows should be the same as those of  $\tilde{A}_j$ . So,  $Y$  has  $2m+1$  rows and  $k$  columns, but it reduces to a single vector  $y$  when  $Y$  has only one column.

The singular value decomposition (SVD) of matrix  $Y$  is defined as follows:

$$Y = U_Y S_Y V_Y^T + E_Y \quad (6)$$

$U_Y$  is a matrix of  $(2m+1) \times (2m+1)$ .  $V_Y^T$  is a square matrix of  $k \times k$ .  $S_Y$  is a  $(2m+1) \times k$  matrix, and its diagonal elements of  $\sigma_1, \sigma_2, \dots, \sigma_k$  are the singular values of the matrix  $Y$ .  $E_Y$  is the residual matrix. In general, it is small enough to be negligible. Here, we give an index  $r$ , which makes the value of  $(\sigma_1 + \sigma_2 + \dots + \sigma_r) / (\sigma_1 + \sigma_2 + \dots + \sigma_r + \dots + \sigma_k)$  greater than or equal to 0.9 (90 %), and the 1, ...,  $(2m+1)$  rows and the 1, ...,  $r$  columns of  $U_Y$  are used for the subsequent calculations.

Then, the projection matrix  $R_Y$  from  $Y$  can be calculated as:

$$R_Y = U_Y U_Y^T \quad (7)$$

$R_Y$  is a  $(2m+1) \times (2m+1)$  matrix. The used  $(2m+1) \times r$  part of  $U_Y$  avoids  $R_Y$  transform to an identity matrix. The corresponding null-space projection matrix is defined as:

$$(I - R_Y) = I - U_Y U_Y^T \quad (8)$$

where  $I$  is the  $(2m+1) \times (2m+1)$  identity matrix, Both  $R_Y$  and  $I - R_Y$  are the symmetric matrix.

## 1.3. Positive projection transformation

According to Noda's proposal, the loading matrix  $L$  of  $\tilde{A}_j^P$  is defined as:

$$L = \tilde{A}_j^T U_Y \quad (9)$$

Then,  $\tilde{A}_j^P$  can be expressed as:

$$\tilde{A}_j^P = U_Y L_T \quad (10)$$

Here, we introduce a positive loading matrix  $L_+$ , which comes from  $L$  by data processing.  $L_+$  retains the elements of  $\geq 0$  in  $L$ , and the elements of  $< 0$  are replaced by 0. After positive projection transformation, we obtain a new projection matrix  $\tilde{A}_j^{P+}$ .  $\tilde{A}_j^{P+}$  only reserves the columns in  $\tilde{A}_j^P$  that have the same change (or orientation) direction as in matrix  $Y$ .

$$\tilde{A}_j^{P+} = U_Y L_+^T \quad (11)$$

The corresponding null-space projection matrix is:

$$\tilde{A}_j^{N+} = \tilde{A}_j - \tilde{A}_j^{P+} \quad (12)$$

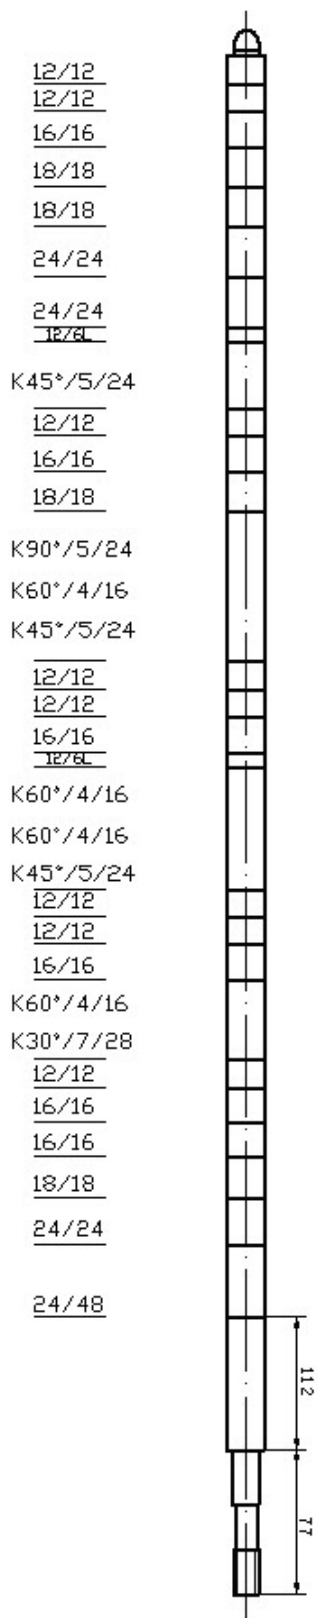

**Figure S1.** The detail screw elements of the twin-screw extruder ( $\Phi 20$  mm) used in our work.

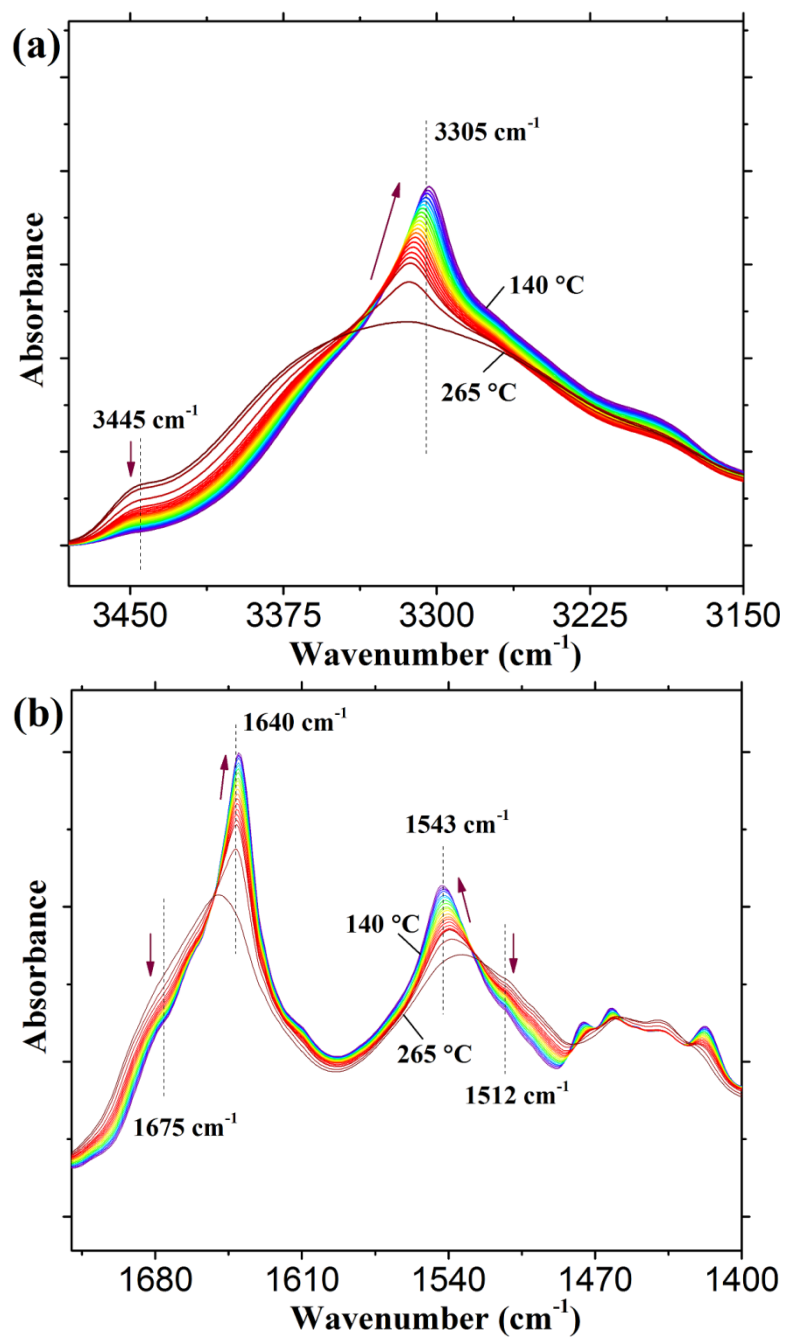

**Figure S2.** The *in situ* FTIR spectra of neat PA6 upon cooling from 265  $^{\circ}\text{C}$  to 140  $^{\circ}\text{C}$ . (a) 3500–3150  $\text{cm}^{-1}$ ; (b) 1700–1400  $\text{cm}^{-1}$ .

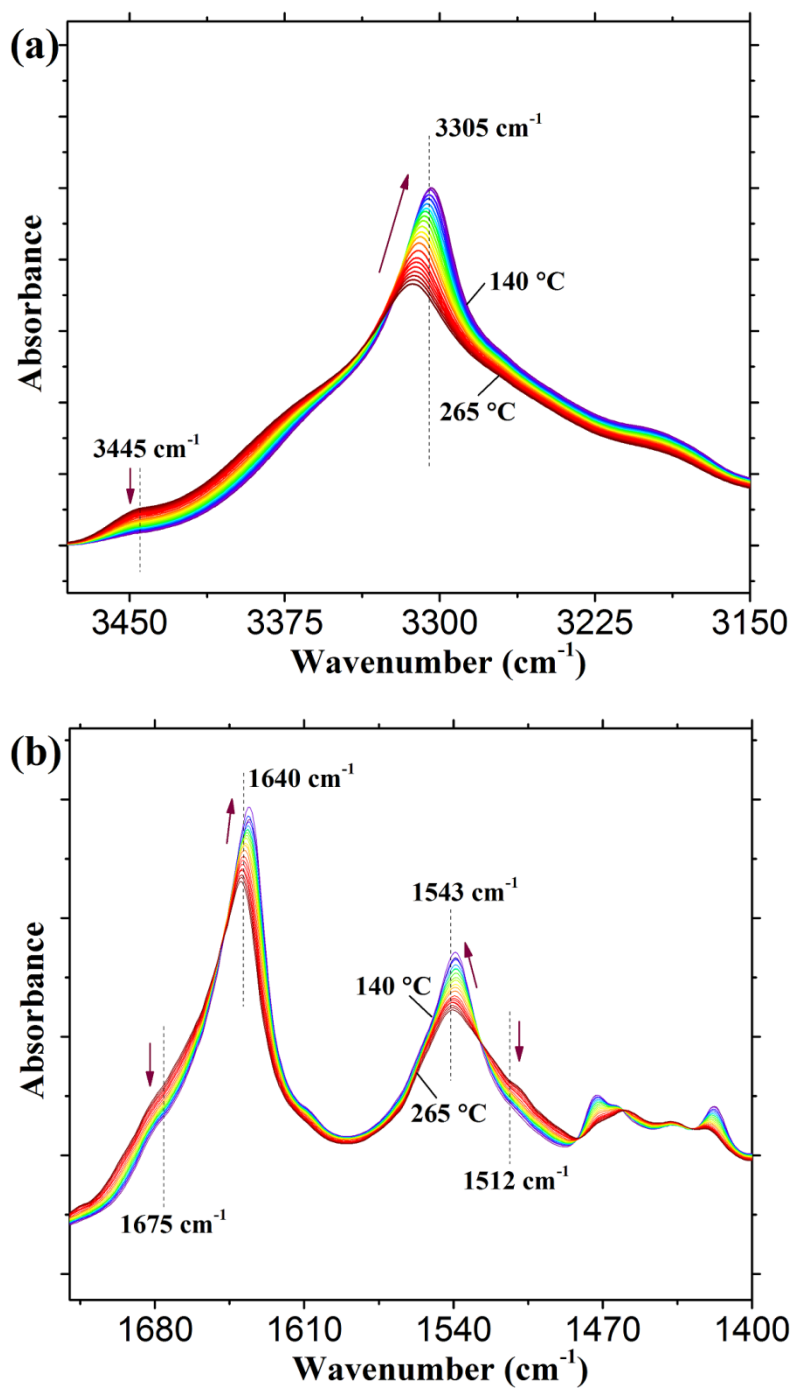

**Figure S3.** The *in situ* FTIR spectra of neat PA66 upon cooling from 265 °C to 140 °C. **(a)** 3500–3150 cm<sup>-1</sup>; **(b)** 1700–1400 cm<sup>-1</sup>.

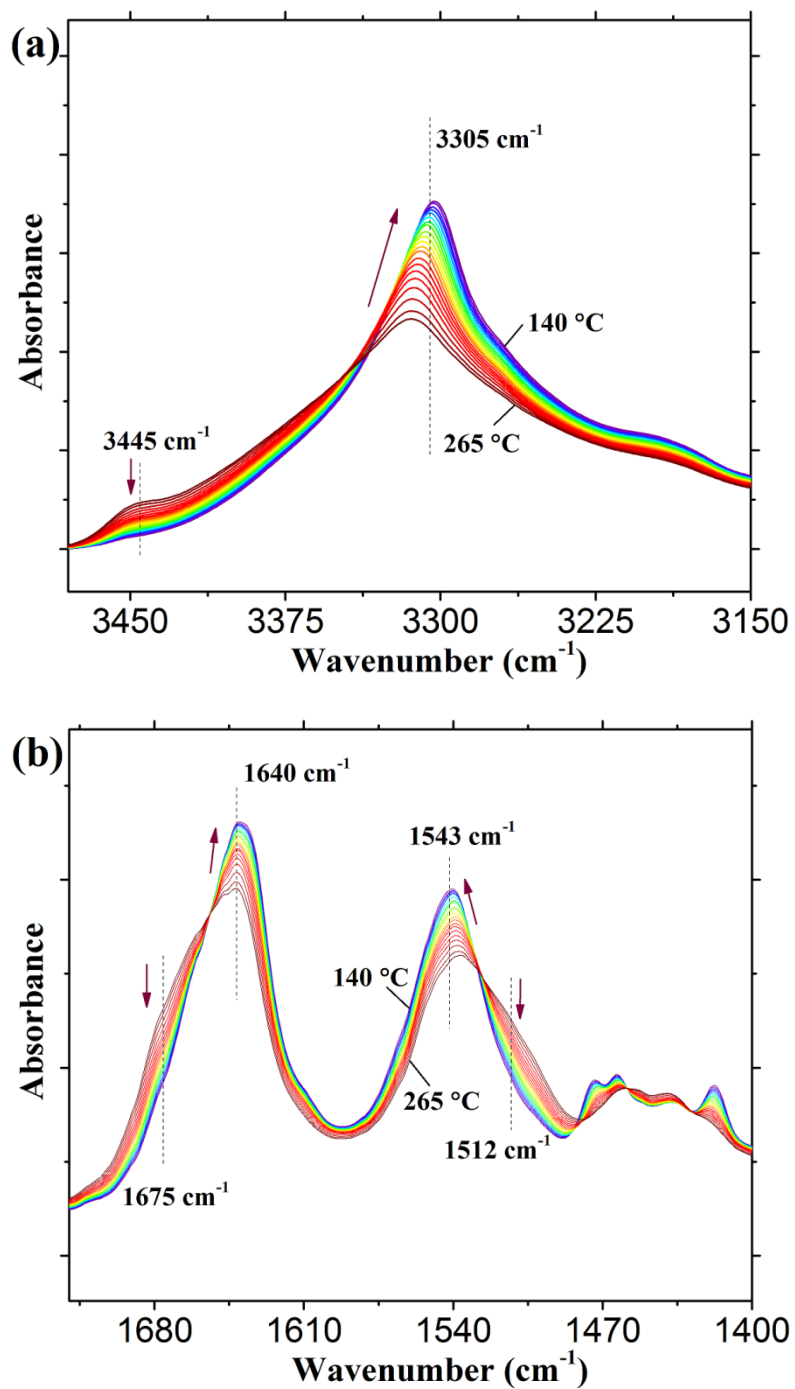

**Figure S4.** The *in situ* FTIR spectra of PA6/PA66 (60:40) alloy upon cooling from 265 °C to 140 °C. **(a)** 3500–3150 cm<sup>-1</sup>; **(b)** 1700–1400 cm<sup>-1</sup>.
